# Supplementary material for: Variability and trends of upper-tropospheric aerosols over the Asian summer monsoon region: An AeroCom multi-model study
Source: Copernicus journal article supplement (doi:10.5194/egusphere-2025-6257), 2026-01-14
Supplement: Supplementary file [file egusphere-2025-6257-AC2-supplement.pdf]

# Supplement to “Variability and trends of upper-tropospheric aerosols over the Asian summer monsoon region: An AeroCom multi-model study”

By Mian Chin et al.

## S1. Transport and Removal tracers for AeroCom Phase-III model experiments

In order to diagnose the inter-model differences and the inter-annual variability of characteristics in transport and removal processes for the current AeroCom Phase III model experiments, it is recommended to implement common tracers of transport and dry/wet removal across all models for all simulated years. These requirements are described below. One-year spin-up is recommended.

### a) Transport tracer: CO with prescribed source and sink

We will use CO with prescribed monthly emissions for 2010 and a 50-day lifetime (exponential decay rate =  $2.315 \times 10^{-7} \text{ s}^{-1}$ ) as a common transport tracer for all models and for all simulated years. Sources of CO are from (1) direct emissions from anthropogenic and biomass burning emissions, (2) production from non-methane volatile organic compounds (NMVOC) oxidation, and (3) from methane oxidation. To simplify the tracer implementation, we treat the atmospheric production of CO from all NMVOC oxidation in a manner of direct emission, as described below.

- Prescribed sources:
  - CO from anthropogenic (anthro) emissions: CMIP6, 2010, annual total=617.2 Tg/yr
  - CO from biomass burning (bb) emissions: CMIP6, 2010, annual total=336.8 Tg/yr
  - CO from anthro NMVOC oxidation: Assuming it is in the order of 0.20 of the direct anthropogenic emission of CO (Bian et al., 2007). Annual total = 123.4 Tg/yr
  - CO from bb NMVOC oxidation: Assuming it is in the order of 0.11 of the direct biomass burning (bb) emission of CO (Bian et al., 2007). Annual total = 37.1 Tg/yr
  - CO from biogenic (bio) NMVOC oxidation: Assuming a CO yield of 0.2 from the oxidation of isoprene, monoterpene, and other biogenic NMVOC species (Bian et al., 2007). The CO from biogenic NMVOC is calculated based on the 2010 NMVOC emissions in the GMI model with an annual total of 254.5 Tg/yr
  - CO from CH<sub>4</sub> oxidation: assuming a fixed uniform CH<sub>4</sub> concentration of 1760 ppbv and a CH<sub>4</sub> decay rate =  $3.73 \times 10^{-9} \text{ s}^{-1}$  (lifetime 8.5 years) to produce CO with a molar yield of 0.86
  - Reference: Bian, H., M. Chin, S.R. Kawa, B. Duncan, A. Arellano, and P. Kasibhatla, Sensitivity of global CO simulations to uncertainties in biomass burning sources, *J. Geophys. Res.*, 112, D23308, doi:10.1029/2006JD008376, 2007

Annual total source of transport tracer CO (excluding CO from CH<sub>4</sub> oxidation) is 1368 Tg/yr, as listed in Table S1.

**Table S1.** Annual sources of CO (used for TRCO50).

| Source          | Direct emission | NM VOC oxidation | Total (Tg yr <sup>-1</sup> ) |
|-----------------|-----------------|------------------|------------------------------|
| Anthropogenic   | 616.6           | 123.3            | 739.9                        |
| Biomass burning | 336.8           | 37.0             | 373.8                        |
| Biogenic        | ---             | 254.5            | 254.5                        |
| Total           | 953.4           | 414.8            | <b>1368.2</b>                |

**Figure S1** shows the annual average of the five CO sources treated as “emission”:

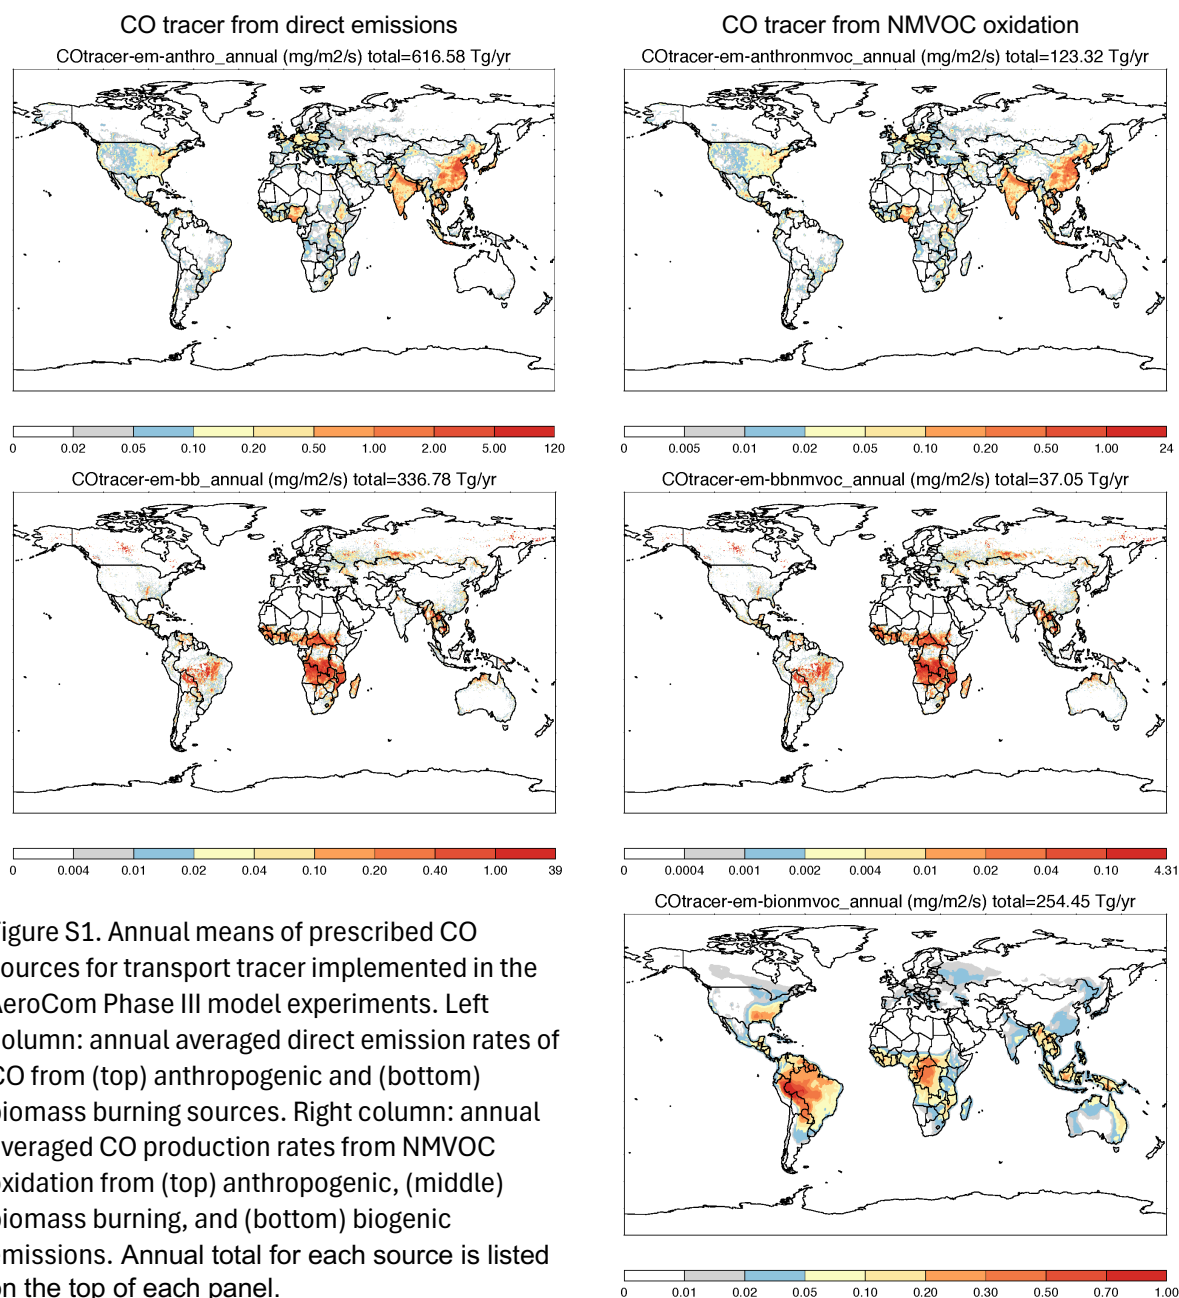

Figure S1. Annual means of prescribed CO sources for transport tracer implemented in the AeroCom Phase III model experiments. Left column: annual averaged direct emission rates of CO from (top) anthropogenic and (bottom) biomass burning sources. Right column: annual averaged CO production rates from NMVOC oxidation from (top) anthropogenic, (middle) biomass burning, and (bottom) biogenic emissions. Annual total for each source is listed on the top of each panel.

## b) Deposition tracer: $^{210}\text{Pb}$ (lead-210) with common source and prescribed sink

$^{210}\text{Pb}$  is formed from  $^{222}\text{Rn}$  decay and attached to fine-mode aerosols that will experience the same removal processes as soluble aerosols. Prescribed emissions of  $^{222}\text{Rn}$  and removals of  $^{222}\text{Rn}$  and  $^{210}\text{Pb}$  are listed below.

- $^{222}\text{Rn}$  emission from land: The prescribed monthly varying  $^{222}\text{Rn}$  emission dataset from Zhang, B. et al., 2019 (modified from Zhang K. et al., 2011) will be used for all simulations. Total annual emission is 14.4 kg/yr.
- $^{210}\text{Pb}$  production from the  $^{222}\text{Rn}$  radio-active decay: A fixed first order decay rate of  $^{222}\text{Rn}$  at  $2.11 \times 10^{-6} \text{ s}^{-1}$  (equivalent to 5.5 days of lifetime or 3.8 days of half-life) is prescribed to produce  $^{210}\text{Pb}$ . No other removal of  $^{222}\text{Rn}$ .
- $^{210}\text{Pb}$  removal: the dry and wet deposition should be implemented in the models in the way as if it were sulfate.
- Reference: (1) Zhang, B., et al., Simulation of Radon-222 with the GEOS-Chem global model: Emissions, Seasonality, and Convective Transport, to be submitted to Atmos. Chem. Phys., 2019; (2) Zhang, K., et al., Radon activity in the lower troposphere and its impact on ionization rate: A global estimate using different radon emissions, Atmos. Chem. Phys., 11(15), 7817–7838, doi:10.5194/acp-11-7817-2011, 2011.

Figure S2 shows the annual average  $^{222}\text{Rn}$  emission rate and its spatial distribution.

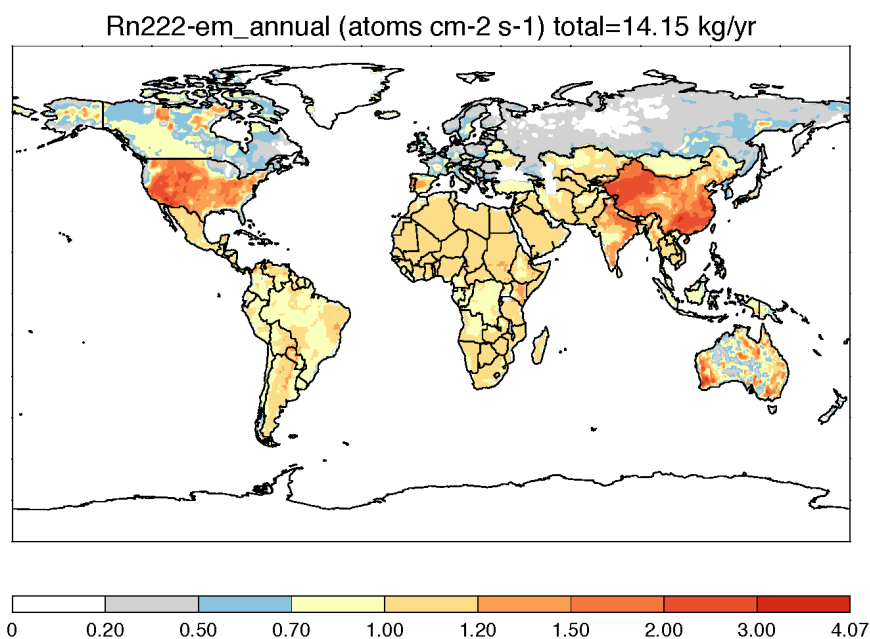

Figure S2. Annual averaged  $^{222}\text{Rn}$  emission rate. (Note: 1 mole  $^{222}\text{Rn}$  = 222 g =  $6.023 \times 10^{23}$  atoms.) Total annual emission (in  $\text{kg yr}^{-1}$ ) is listed on the top of the panel.

## S2. Multi-model ensemble means and inter-model spread

Table S2. Multi-model (excluding ECHAM6-HAMMOZ) ensemble means, standard deviation (Stdev), and coefficient of variation (CV in %) of AEC, TR<sub>CO50</sub>, and TR<sub>Pb/Rn</sub> over the ASMA region at 150 hPa for each August during 2000–2018. (Highlighted is the August 2012 case presented in detail in the manuscript.)

| Year | AEC<br>(10 <sup>3</sup> km <sup>-1</sup> ) | Stdev<br>AEC | CV %  | TR <sub>CO50</sub><br>(ppb) | Stdev<br>TR <sub>CO50</sub> | CV % | TR <sub>Pb/Rn</sub><br>(kg kg <sup>-1</sup> ) | Stdev<br>Pb/Rn | CV %  |
|------|--------------------------------------------|--------------|-------|-----------------------------|-----------------------------|------|-----------------------------------------------|----------------|-------|
| 2000 | 1.022                                      | 0.821        | 80.33 | 104.40                      | 4.93                        | 4.72 | 0.803                                         | 0.296          | 36.86 |
| 2001 | 0.962                                      | 0.770        | 80.04 | 97.27                       | 6.35                        | 6.53 | 0.805                                         | 0.292          | 36.27 |
| 2002 | 1.014                                      | 0.799        | 78.80 | 97.48                       | 2.40                        | 2.46 | 0.816                                         | 0.301          | 36.89 |
| 2003 | 0.988                                      | 0.752        | 76.11 | 101.80                      | 6.16                        | 6.05 | 0.773                                         | 0.276          | 35.71 |
| 2004 | 0.951                                      | 0.741        | 77.92 | 94.79                       | 7.29                        | 7.69 | 0.789                                         | 0.285          | 36.12 |
| 2005 | 1.027                                      | 0.793        | 77.22 | 101.58                      | 4.04                        | 3.98 | 0.799                                         | 0.276          | 34.54 |
| 2006 | 1.186                                      | 0.761        | 64.17 | 97.11                       | 3.29                        | 3.39 | 0.806                                         | 0.308          | 38.21 |
| 2007 | 1.082                                      | 0.875        | 80.87 | 100.66                      | 5.33                        | 5.30 | 0.797                                         | 0.300          | 37.64 |
| 2008 | 1.267                                      | 0.960        | 75.77 | 101.56                      | 4.67                        | 4.60 | 0.804                                         | 0.286          | 35.57 |
| 2009 | 1.032                                      | 0.769        | 74.52 | 99.93                       | 4.24                        | 4.24 | 0.817                                         | 0.294          | 35.99 |
| 2010 | 1.257                                      | 1.078        | 85.76 | 98.94                       | 4.14                        | 4.18 | 0.758                                         | 0.257          | 33.91 |
| 2011 | 1.239                                      | 0.934        | 75.38 | 99.60                       | 3.06                        | 3.07 | 0.796                                         | 0.286          | 35.93 |
| 2012 | 1.219                                      | 0.964        | 79.08 | 105.20                      | 3.46                        | 3.29 | 0.792                                         | 0.275          | 34.72 |
| 2013 | 1.215                                      | 0.948        | 78.02 | 97.40                       | 3.22                        | 3.31 | 0.789                                         | 0.281          | 35.61 |
| 2014 | 1.190                                      | 0.939        | 78.91 | 99.54                       | 3.90                        | 3.92 | 0.796                                         | 0.287          | 36.06 |
| 2015 | 1.235                                      | 0.824        | 66.72 | 93.17                       | 5.45                        | 5.85 | 0.814                                         | 0.288          | 35.38 |
| 2016 | 1.233                                      | 0.968        | 78.51 | 102.21                      | 4.68                        | 4.58 | 0.793                                         | 0.270          | 34.05 |
| 2017 | 1.127                                      | 0.855        | 75.87 | 101.56                      | 2.93                        | 2.88 | 0.789                                         | 0.276          | 34.98 |
| 2018 | 1.179                                      | 0.932        | 79.05 | 102.75                      | 4.15                        | 4.04 | 0.812                                         | 0.281          | 34.61 |
